# Supplementary material for: Tailoring the extraction process and properties of polysaccharides from the lichen Evernia prunastri using natural eutectic solvents following a biorefinery approach
Source: Royal Society of Chemistry journal article supplement (doi:10.1039/d5gc01413a), 2025-01-01
Supplement: d5gc01413a1.pdf [file d5gc01413a1.pdf]

## Supplementary material

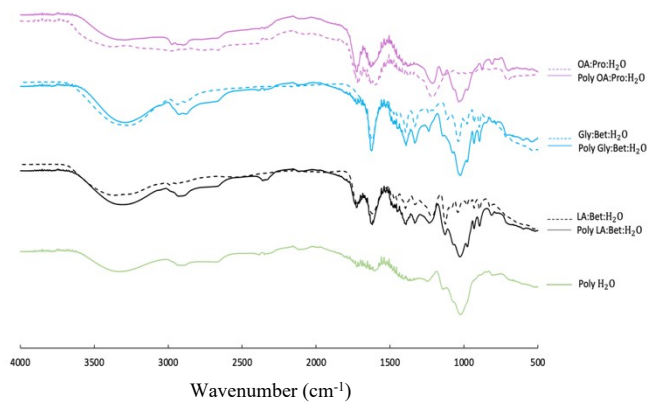

Supplementary material 1: FT-IR spectrum of the polysaccharides extracted with the different eutectic solvents (continuous) and their corresponding solvent (dash).

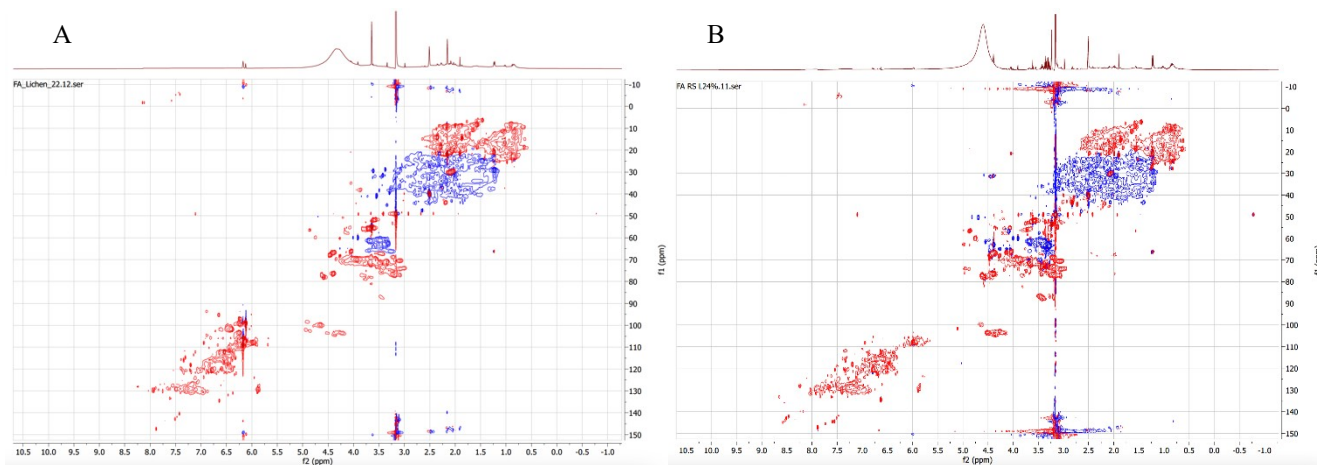

Supplementary 2: <sup>1</sup>H-<sup>13</sup>C HSQC NMR spectra of fulvic acid from the raw lichen FA RL22 (A) and from the residual solid FA RSL24 (B)
